# Supplementary material
Source: bioRxiv or medRxiv preprint supplement (https://medrxiv.org/highwire/filestream/73425/field_highwire_adjunct_files/0/2020.03.07.20032706-1.pdf)
Supplement: Supplementary file [file 2020.03.07.20032706-1.pdf]

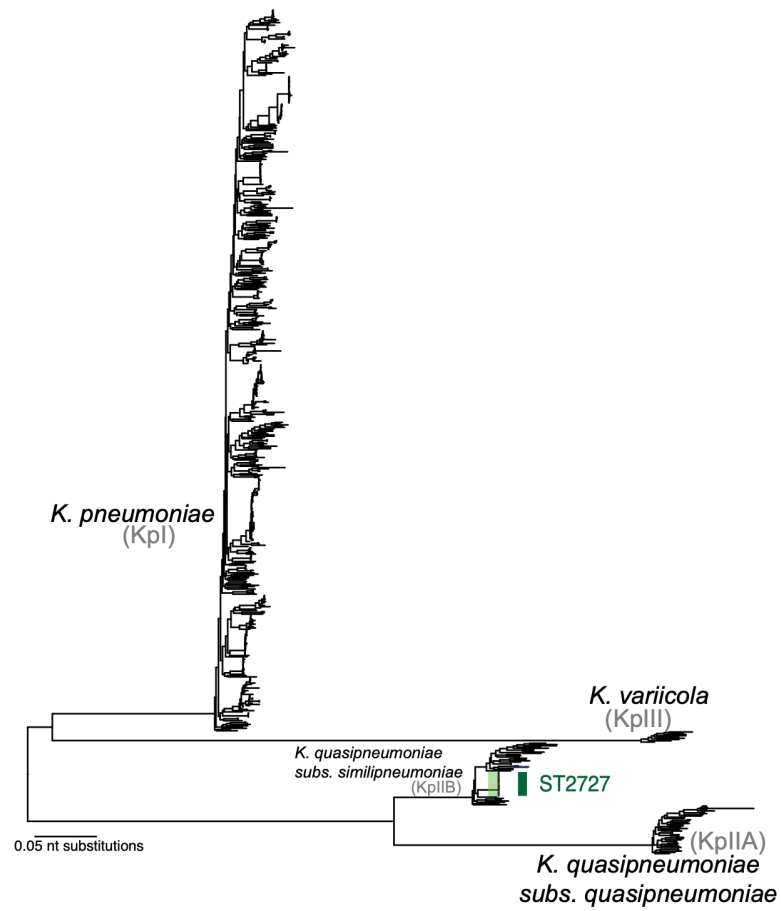

**Figure S1. Evolutionary relationships of *Klebsiella* species complex.** Maximum likelihood phylogeny was generated using >4000 genomes and pruned to 674 genomes maintaining phylogenetic structure. Scale bar represents nucleotide substitution rate per site.

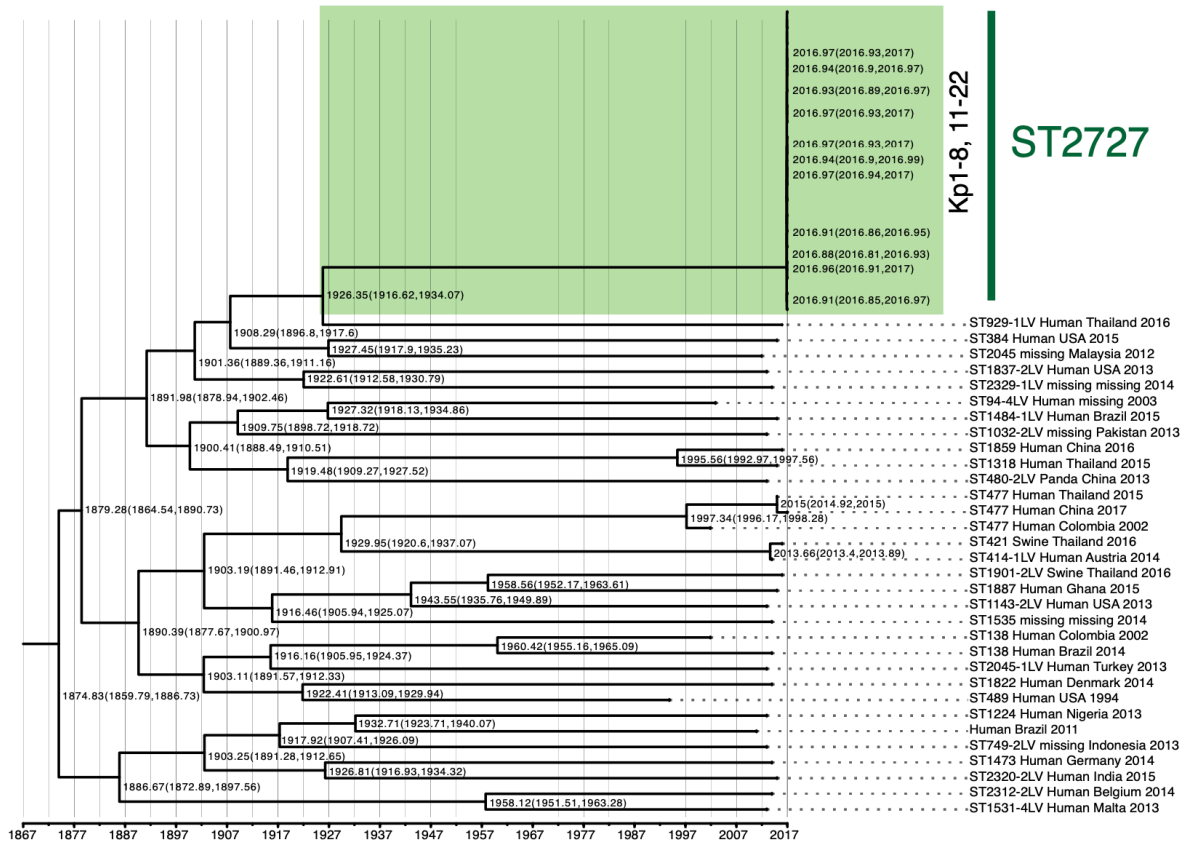

**Figure S2. Time-calibrated phylogeny of KpIIB.** A dated tree was generated using LSD. The node labels represent the year of divergence with its confidence interval (95%). The scale is represented in years.

**Data S1.** Summary of all genomes used for the phylogenic analysis

[https://bridges.monash.edu/articles/Genomic\\_characteristics\\_of\\_4238\\_Klebsiella\\_genomes/11931231](https://bridges.monash.edu/articles/Genomic_characteristics_of_4238_Klebsiella_genomes/11931231)

**Table S1.** Assembly and annotation summary of *Klebsiella* isolates

| Sample | MLST   | Size      | GC% | Scaffolds | Predicted genes |      |      |
|--------|--------|-----------|-----|-----------|-----------------|------|------|
|        |        |           |     |           | tRNA            | rRNA | CDS  |
| Kp1    | ST2727 | 5,201,460 | 57  | 129       | 68              | 11   | 4709 |
| Kp2    | ST2727 | 5,200,839 | 57  | 133       | 74              | 10   | 4710 |
| Kp3    | ST2727 | 5,198,874 | 57  | 127       | 73              | 4    | 4707 |
| Kp4    | ST2727 | 5,199,425 | 57  | 91        | 74              | 7    | 4708 |
| Kp5    | ST2727 | 5,198,717 | 57  | 100       | 73              | 11   | 4712 |
| Kp6    | ST2727 | 5,197,993 | 57  | 64        | 75              | 10   | 4710 |
| Kp7    | ST2727 | 5,201,796 | 57  | 86        | 73              | 5    | 4714 |
| Kp8    | ST2727 | 5,192,865 | 57  | 76        | 75              | 5    | 4708 |
| Kp11   | ST2727 | 5,203,456 | 57  | 102       | 74              | 7    | 4715 |
| Kp12   | ST2727 | 5,195,751 | 57  | 93        | 69              | 5    | 4709 |
| Kp13   | ST2727 | 5,204,820 | 57  | 105       | 70              | 5    | 4711 |
| Kp14   | ST2727 | 5,197,183 | 57  | 122       | 70              | 11   | 4706 |
| Kp15   | ST2727 | 5,200,320 | 57  | 106       | 72              | 10   | 4711 |
| Kp16   | ST2727 | 5,201,484 | 57  | 112       | 75              | 9    | 4708 |
| Kp17   | ST2727 | 5,200,051 | 57  | 111       | 73              | 12   | 4711 |
| Kp18   | ST2727 | 5,207,110 | 57  | 149       | 75              | 5    | 4712 |
| Kp19   | ST2727 | 5,203,751 | 57  | 133       | 70              | 6    | 4709 |
| Kp20   | ST2727 | 5,211,171 | 57  | 180       | 73              | 6    | 4714 |
| Kp21   | ST2727 | 5,199,699 | 57  | 115       | 74              | 6    | 4708 |
| Kp22   | ST2727 | 5,202,717 | 57  | 142       | 71              | 10   | 4717 |

**Table S2.** Capsule serotype *K- locus* and *O-locus*.

| Isolates | MLST   | <i>In silico</i> |         |         |
|----------|--------|------------------|---------|---------|
|          |        | wzi              | K_locus | O_locus |
| Kp1      | ST2727 | wzi56            | KL55    | O3/O3a  |
| Kp2      | ST2727 | wzi56            | KL55    | O3/O3a  |
| Kp3      | ST2727 | wzi56            | KL55    | O3/O3a  |
| Kp4      | ST2727 | wzi56            | KL55    | O3/O3a  |
| Kp5      | ST2727 | wzi56            | KL55    | O3/O3a  |
| Kp6      | ST2727 | wzi56            | KL55    | O3/O3a  |
| Kp7      | ST2727 | wzi56            | KL55    | O3/O3a  |
| Kp8      | ST2727 | wzi56            | KL55    | O3/O3a  |
| Kp11     | ST2727 | wzi56            | KL55    | O3/O3a  |
| Kp12     | ST2727 | wzi56            | KL55    | O3/O3a  |
| Kp13     | ST2727 | wzi56            | KL55    | O3/O3a  |
| Kp14     | ST2727 | wzi56            | KL55    | O3/O3a  |
| Kp15     | ST2727 | wzi56            | KL55    | O3/O3a  |
| Kp16     | ST2727 | wzi56            | KL55    | O3/O3a  |
| Kp17     | ST2727 | wzi56            | KL55    | O3/O3a  |
| Kp18     | ST2727 | wzi56            | KL55    | O3/O3a  |
| Kp19     | ST2727 | wzi56            | KL55    | O3/O3a  |
| Kp20     | ST2727 | wzi56            | KL55    | O3/O3a  |
| Kp21     | ST2727 | wzi56            | KL55    | O3/O3a  |
| Kp22     | ST2727 | wzi56            | KL55    | O3/O3a  |

**Table S3.** Virulence features of 22 *K. pneumoniae* isolates.

| Isolates | MLST   | Experimental                    | In silico                                                  |
|----------|--------|---------------------------------|------------------------------------------------------------|
|          |        | Virulence genes                 | Virulence genes                                            |
| Kp1      | ST2727 | <i>uge, fimH-1, mrkD</i>        | <i>allS, entA, entB, fimH, KfuB, KfuC, magA, mrkD, uge</i> |
| Kp2      | ST2727 | <i>uge, fimH-1, mrkD</i>        | <i>allS, entA, entB, fimH, KfuB, KfuC, magA, mrkD, uge</i> |
| Kp3      | ST2727 | <i>uge, fimH-1, mrkD, kfuBC</i> | <i>allS, entA, entB, fimH, KfuB, KfuC, magA, mrkD, uge</i> |
| Kp4      | ST2727 | <i>uge, fimH-1, mrkD</i>        | <i>allS, entA, entB, fimH, KfuB, KfuC, magA, mrkD, uge</i> |
| Kp5      | ST2727 | <i>uge, fimH-1, mrkD</i>        | <i>allS, entA, entB, fimH, KfuB, KfuC, magA, mrkD, uge</i> |
| Kp6      | ST2727 | <i>uge, fimH-1, mrkD, ybtA,</i> | <i>allS, entA, entB, fimH, KfuB, KfuC, magA, mrkD, uge</i> |
| Kp7      | ST2727 | <i>uge, fimH-1, mrkD</i>        | <i>allS, entA, entB, fimH, KfuB, KfuC, magA, mrkD, uge</i> |
| Kp8      | ST2727 | <i>uge, fimH-1, mrkD, kfuBC</i> | <i>allS, entA, entB, fimH, KfuB, KfuC, magA, mrkD, uge</i> |
| Kp11     | ST2727 | <i>uge, fimH-1, mrkD</i>        | <i>allS, entA, entB, fimH, KfuB, KfuC, magA, mrkD, uge</i> |
| Kp12     | ST2727 | <i>uge, fimH-1, mrkD</i>        | <i>allS, entA, entB, fimH, KfuB, KfuC, magA, mrkD, uge</i> |
| Kp13     | ST2727 | <i>uge, fimH-1, mrkD</i>        | <i>allS, entA, entB, fimH, KfuB, KfuC, magA, mrkD, uge</i> |
| Kp14     | ST2727 | <i>uge, fimH-1, mrkD</i>        | <i>allS, entA, entB, fimH, KfuB, KfuC, magA, mrkD, uge</i> |
| Kp15     | ST2727 | <i>uge, fimH-1, mrkD</i>        | <i>allS, entA, entB, fimH, KfuB, KfuC, magA, mrkD, uge</i> |
| Kp16     | ST2727 | <i>uge, fimH-1, mrkD, iroN</i>  | <i>allS, entA, entB, fimH, KfuB, KfuC, magA, mrkD, uge</i> |
| Kp17     | ST2727 | <i>uge, fimH-1, mrkD</i>        | <i>allS, entA, entB, fimH, KfuB, KfuC, magA, mrkD, uge</i> |
| Kp18     | ST2727 | <i>uge, fimH-1, mrkD</i>        | <i>allS, entA, entB, fimH, KfuB, KfuC, magA, mrkD, uge</i> |
| Kp19     | ST2727 | <i>uge, fimH-1, mrk, iroN</i>   | <i>allS, entA, entB, fimH, KfuB, KfuC, magA, mrkD, uge</i> |
| Kp20     | ST2727 | <i>uge, fimH-1, mrkD</i>        | <i>allS, entA, entB, fimH, KfuB, KfuC, magA, mrkD, uge</i> |
| Kp21     | ST2727 | <i>uge, fimH-1, mrkD, A</i>     | <i>allS, entA, entB, fimH, KfuB, KfuC, magA, mrkD, uge</i> |
| Kp22     | ST2727 | <i>uge, fimH-1, mrkD, wcaG</i>  | <i>allS, entA, entB, fimH, KfuB, KfuC, magA, mrkD, uge</i> |

**Table S4.** Genes in ST2727 under negative selection

| <b>Genes Product</b>                                                   | <b>Gene ID</b> |
|------------------------------------------------------------------------|----------------|
| 23S rRNA (adenine(1618)-N(6))-methyltransferase RlmF                   | WP_017900155.1 |
| Alpha/beta hydrolase                                                   | WP_043519619.1 |
| Arabinose operon transcriptional regulator AraC                        | WP_004204301.1 |
| Carbohydrate ABC transporter permease                                  | WP_004203287.1 |
| Carbon starvation protein A                                            | WP_004204173.1 |
| Formate dehydrogenase-N subunit alpha                                  | WP_121499582.1 |
| HTH-type transcriptional activator AllS                                | WP_043521430.1 |
| Isopenicillin N synthase family oxygenase                              | WP_043521356.1 |
| LacI family DNA-binding transcriptional regulator                      | WP_043519228.1 |
| LysR family transcriptional regulator                                  | WP_043521817.1 |
| MFS transporter                                                        | WP_043521375.1 |
| MFS transporter                                                        | WP_043522250.1 |
| MFS transporter                                                        | WP_052469705.1 |
| Na <sup>+</sup> /H <sup>+</sup> antiporter                             | WP_002885082.1 |
| NCS1 family nucleobase:cation symporter-1                              | WP_043519602.1 |
| Nickel ABC transporter permease subunit NikC                           | WP_004202068.1 |
| Peptidoglycan glycosyltransferase/peptidoglycan DD-transpeptidase MrcA | WP_043522602.1 |
| ROK family transcriptional regulator                                   | WP_004203282.1 |
| Thiamine/thiamine pyrophosphate ABC transporter permease ThiP          | WP_004204304.1 |
| Transcriptional regulator FtrA                                         | WP_043519534.1 |

**Table S5.** Genes in ST2727 under positive selection

| <b>Gene Product</b>                                                 | <b>Gene ID</b> |
|---------------------------------------------------------------------|----------------|
| ABC transporter ATP-binding protein                                 | WP_012968222.1 |
| AEC family transporter                                              | WP_004203397.1 |
| ATP-dependent helicase HrpB                                         | WP_043521993.1 |
| BMC domain-containing protein                                       | WP_004182810.1 |
| Efflux RND transporter permease subunit                             | WP_043519810.1 |
| HlyD family secretion protein                                       | WP_023291696.1 |
| HslU--HslV peptidase ATPase subunit                                 | WP_004203674.1 |
| M20 family peptidase                                                | WP_043519571.1 |
| NADPH-dependent assimilatory sulfite reductase flavoprotein subunit | WP_043520757.1 |
| Tautomerase family protein                                          | WP_004203532.1 |
